# Supplementary material for: Decoding chromosomal instability insights in CRC by integrating omics and patient-derived organoids
Source: Springer Nature journal article supplement (doi:10.1186/s13046-025-03308-8), 2025-02-28

## SUPPLEMENTARY METHODS

### Ethics

The study was approved by the Hospital Clínico Universitario de Valencia Ethics Committee (2018/063, 2021/083). All patients provided written informed consent for the collection of fresh tissues and clinical data. The study followed all approved protocols and procedure and was conducted in compliance with the Declaration of Helsinki.

### Tissue processing and organoid culture

Fresh tissues were collected in PBS with penicillin/streptomycin and quickly processed as previously published[9]. Briefly, tissue samples were minced into small fragments. Some were stored for DNA and RNA extraction depending on the total amount of tissue. All the remaining fragments were mechanically and enzymatically digested with a collagenase-based solution (Sigma- Aldrich, cat. No. 269395) until reaching single cells. These were resuspended in basal media with 50% reduced-growth factor basement membrane matrix (BME Type 2, R&D, cat. No. 3533-010-002) and plated in prewarmed culture plates in complete medium with the following composition: 1x N2 (cat.no. 17502048), 1x B27 (cat.no. C21-H), 1mM N-acetyl L-cysteine (cat.no. A9165), 10 mM nicotinamide (cat.no. N0636), 50 ng/mL hr-EGF (cat.no. BMS320), 100 ng/mL hr-noggin (cat.no. 6057-NG-025), 0.5  $\mu$ M A-83-01 (cat.no. SML0788), 10  $\mu$ M SB202190 (cat.no. S7067), 10 nM gastrin (cat.no. G9145), 500 ng/mL hr-RSPO1 (cat.no. 4645- RS), 10 ng/mL hr-FGF10 (cat.no. 100-26), 10 nM PGE2 (cat.no. P6532), 10  $\mu$ M Y-27632 (cat.no. Y0503). After reaching the appropriate volume, organoids were trypsinized with TrypLE™ Express (Life Technologies, cat. No. 12605-010) to expand them. Aliquots were stored in liquid nitrogen to constitute a biobank. Supplementary table S2 shows the main features of the organoids models employed in this paper and the kind of analysis performed for each one.

### Copy number analysis

Fresh tissues and PDOs DNA were extracted with the QIAamp DNA Micro Kit (Qiagen, cat. No. 56304). Cytoscan HD for whole genome copy number variation was performed according to manufacturer protocol in the Multigenic Analysis Service (UCIM), Faculty of Medicine, Valencia. Briefly, between 80 and 500 ng of integer genomic DNA was digested and ligated. Amplicons were generated by performing PCR using primers provided by the manufacturer (Affymetrix, CA) using the following program: 94°C for 3 min, then 35 cycles of 94°C 30 sec, 60°C for 45 sec and 65°C for 1 min. This was followed by extension at 68°C for 7 min. The PCR products were then purified and digested with DNAaseI for 35 min at 37°C to fragment the amplified DNA. The fragmented DNA was then labeled with biotinylated nucleotides through terminal deoxynucleotide transferase for 4 hours at 37°C. Fragmented DNA was hybridized with a pre-equilibrated Affymetrix chip Cytoscan HD chip at 50°C for 18 hours. CytoscanHD chips washing and scanning followed the procedures of the Affymetrix Inc. manuals. CEL files were generated from AGCC software from Affymetrix, Inc. (Santa Clara, CA).

CytoScan HD CEL files were processed through Chromosome Analysis Suite (ChAS) software version 4.1 with a single sample algorithm. All samples were manually reviewed, and unbalanced samples were reprocessed with normal diploid algorithm. Obtained Chyp files were analyzed with ChAS and IGV software v. 3.0. Copy number data were retrieved for further analysis.

### CIN status determination

Weighted Genome Instability Index (wGII) was calculated as published elsewhere[10]. Briefly, genomic co-ordinates of all gain and lost regions were retrieved from ChAS software for each sample. Co-ordinates were manually reviewed to exclude overlap between regions. The total of copy number alterations (CNA) in terms of base pair (bp) was calculated and normalized for chromosome length and wGII expressed as median CNA across the genome. wGII correlation between PDOs and matched fresh tissue was conducted with linear regression analysis. All the calculations were conducted in RStudio.

### Hematoxylin and eosin staining

As previously described [9], PDOs domes were collected in 4% neutral buffered formalin and paraffin embedded. 4  $\mu$ m slides were cut, dewaxed and hematoxylin and eosin (Dako, cat. No. CS700 and CS701) staining was performed. Mitotic figures count has been performed by an expert pathologist.

### RNA-Sequencing (RNA-seq)

As previously published [9], total RNA was extracted from fresh tissues and PDOs with RNeasy Micro Kit (cat. no. 74004) and integrity verified with TapeStation RNA Analysis ScreenTape (Agilent Technologies). Sequencing libraries were prepared with the NEBNext® Ultra (TM) II Directional RNA Library Prep Kit for Illumina® Module (New England BioLabs) and NEBNext Poly(A) mRNA Magnetic Isolation Module for mRNA enrichment following the manufacturer's instructions. Libraries were paired end sequenced in an Illumina NextSeq 550 platform with a NextSeq 500/550 High Output 300 cycles kit.

### Proteomics analysis by LC-MS/MS-SWATH

#### Sample preparation

As previously described [9], PDO pellets were lysed in UTC buffer (8M urea, 2M thiourea and 4% CHAPS) and the protein concentration measured with the RC DC Protein Assay (Bio-Rad). A pooled sample containing 5  $\mu$ g of protein from each sample was used to prepare the peptide library. For the SWATH analysis, 20  $\mu$ g of protein from each sample were used. Samples were denatured at 95 °C for 5 min in sample buffer and subjected to sodium dodecyl sulfate-polyacrylamide gel electrophoresis (SDS-PAGE). Pooled samples were resolved in gel and lanes were cut into five pieces. Gels containing individual samples were not resolved and whole samples were sliced into a single piece. Protein digestion and subsequent analysis were performed as published elsewhere (Pinheiro et al., 2020) at the Proteomics Service (SCSIE) of the University of Valencia.

#### LC-MS/MS

Spectral peptide library was obtained by liquid chromatography and tandem mass spectrometry (LC-MS/MS) analysis, operating the instrument in a data-dependent acquisition mode. Peptide mixtures were loaded onto a trap column (3 $\mu$  C18-CL, 350  $\mu$ m x 0.5mm; Eksigent) and desalted with 0.1 % TFA at 5  $\mu$ L/min for 5 min. Peptides were then loaded onto an analytical column (3 $\mu$  C18-CL 120 Å, 0.075 x 150 mm; Eksigent) equilibrated in 5% acetonitrile 0.1 % FA (formic acid). Elution was carried out with a linear gradient of 7-40 % buffer B in A (A: 0.1 % FA; B: 5 % acetonitrile (ACN), 0.1 % FA) at a flow rate of 300 nL/min over 60 min. Eluted peptides were analyzed in a mass spectrometer nanoESI-qTOF (TripleTOF 6600; SCIEX). Up to 100 ions were selected for fragmentation after each survey scan. Data files were processed using the ProteinPilot search engine (version 5.0, SCIEX) to search the Swiss-Prot database with the following parameters: Trypsin specificity, IAM cys-alkylation, Species *Homo sapiens*, and the search effort set to thorough and FDR correction.

Quantitative analysis of individual samples was performed by sequential window acquisition of all theoretical spectra-mass spectrometry (SWATH-MS). Peptides were analyzed by LC using a trap column and analytical column as previously described but operating the TripleTOF 6600 mass spectrometer instrument in SWATH mode. We used 100 variable windows from 400 to 1250 m/z with a total cycle time of 2.79 seconds. Quantitative data was extracted from .wiff files with Peak View 2.2 (SCIEX) using the peptide library generated by ProteinPilot as indicated above. For every protein in the spectral library, a maximum of 20 peptides were quantified among those with a confidence threshold of 95 % and a false discovery rate (FDR) lower than 1 %. Shared peptides were excluded. For every peptide, a maximum of six transitions (fragment ions) were quantified. Biological quadruplicates were employed.

#### Data analysis

For RNA-seq data, read quality control was performed with FASTQC v0.11.8. Sequencing adapters and low-quality reads were filtered out with fastp v0.11.8. Filtered reads were mapped against the human reference genome GRCh38 using STAR v2.7.3a. Isoform quantification was performed with RSEM v1.3.3 and further processed with Tximport v1.16.1. Differential expression analysis was conducted with the DESeq2 v1.34 package with RStudio. Resulting p-values were adjusted with the Bonferroni method. Significant genes were selected based on an adjusted p-value cutoff of 0.01 and an absolute log-foldchange greater than 1. GSEA analysis was run against the “Hallmark” gene set from the MSigDB. The significance threshold was set at P-value below 0.05 and nominal FDR below 0.05. The “EMT” gene set (Hallmark\_epithelial\_mesenchymal\_transition) from the Molecular Signatures Database (MSigDB, GSEA) was used to

explore de EMT phenotype across the organoid lines. Unsupervised hierarchical cluster analysis was done using a Euclidean distance measure and Ward linkage with the RStudio.

Motif analysis has been conducted using FASTQ files to run ISMARA software at (<https://ismara.unibas.ch/mara/>). Obtained motif z-values have been filtered out excluding those lower than 1.5.

SWATH quantitative data (protein areas) were median normalized and log2 transformed. Differentially expressed proteins were selected by Student t-test using a p-value of 0.05. Functional analysis of differential proteins was performed using STRING database and Cytoscape StringApp within Cytoscape software.

The correlation between CIN and protein abundance was analyzed by calculating the Pearson coefficient. We used the Pearson function of Microsoft Excel spreadsheet with the median normalized and log2 transformed data for each protein and the wGII value for each sample as function inputs.

### **Statistical analyses**

The significance threshold of all statistical analyses was set at p-value below 0.05. wGII correlation between PDOs and matched fresh tissue was conducted with linear regression analysis. The PDOs-TCGA transcriptomic comparison was performed with Chi-square test. The correlation between CIN and protein abundance was analyzed by calculating the Pearson coefficient. We used the Pearson function of Microsoft Excel spreadsheet with the median normalized and log2 transformed data for each protein and the wGII value for each sample as function inputs. Venn diagrams were used to visualize differences between categorical groups. Statistical analyses related to publicly datasets are described in the corresponding section.

### **Publicly available datasets analysis**

For cell lines dependencies analysis, we selected CIN+ and CIN- cell lines and downloaded combined CRISPR/Cas9 DepMap Public 23Q4+Score and Chronos datasets and from RNA-interference combined Achilles+DRIVE+Marcotte, DEMETER2 from DepMap portal (<https://depmap.org/portal/>) selecting genes from the Pearson signature proteins. Not all corresponding genes were present in the RNA-interference datasets, therefore in this case the analysis was conducted on 130 genes. We compared the dependence score for each gene in CIN+ with respect to CIN- via multiple t-test. Data were represented with Volcano plots indicating the dependence score effect size.

For drugs analysis we downloaded Drug sensitivity AUCs from CTD<sup>2</sup> dataset from DepMap portal. Data belonging to compounds without a defined target and those for whom only one line was tested for each comparison group (CIN+ and CIN-) were discarded. Therefore, data related to 379 drugs were analyzed. We compared the AUCs for each compound in CIN+ with respect to CIN- via multiple t-test. For each drug a pattern was assembled containing the corresponding Ln-AUCs across the cell lines. Next, Z-scores were calculated for each drug, taking into account mean Ln-AUC and standard deviation for each point (LnAUC-mean/standard deviation). Finally, the patterns were aggregated column-wise into a matrix. The obtained matrix was used to assess the relative sensitivity/resistance of each line.

For proteomic public dataset we downloaded proteomic data from Zhang et al [48] and for CIN and MSI annotated samples selected those proteins that we identified from the Pearson signature. We compared protein abundance for each gene in CIN+ with respect to CIN- via multiple t-test. Furthermore, for each (significant) protein a pattern was assembled containing the corresponding across the tissue samples. Next, Z-scores were calculated for each protein, taking into account mean protein abundance and standard deviation for each point (protein abundance-mean/standard deviation). Finally, the patterns were aggregated column-wise into a matrix. Clustering heatmap was built with pheatmap package (Rstudio). Fisher exact test was used to evaluate statistical significance of tissue categorization.

Kaplan-Meier plotter software (<https://kmplot.com/analysis/>) (1-2) was used to evaluate the prognostic value of the prioritized targets. OS was analyzed based on the expression of CRC patients from the TCGA group, MSS and MSI cohort with auto-selected best-cut-off. The Hazard ratio (HR) and log-rank P-value are calculated by the software and curves are plotted.

We used the TNMplot web tool (<https://tnmplot.com/analysis/>) (3) to compare gene expression in CRC tumor versus normal tissue using RNAseq data and normal tissues near the tumor area. Data are represented as box plots.

## **Supplementary References**

1. Lánckzy A, Györffy B. Web-Based Survival Analysis Tool Tailored for Medical Research (KMplot): Development and Implementation. J Med Internet Res. 2021 Jul 26;23(7):e27633. doi: 10.2196/27633
2. Györffy B: Integrated Analysis of Public Datasets for the Discovery and Validation of Survival-Associated Genes in Solid Tumors, The Innovation, 2024, DOI: 10.1016/j.xinn.2024.100625
3. Bartha Á, Györffy B. TNMplot.com: A Web Tool for the Comparison of Gene Expression in Normal, Tumor and Metastatic Tissues. Int J Mol Sci. 2021 Mar 5;22(5):2622. doi: 10.3390/ijms22052622

## SUPPLEMENTARY TABLE

**Table S1 REAGENTS AND TOOLS TABLE**

| Reagent/Resource                                     | Reference or Source          | Identifier or Catalog Number |
|------------------------------------------------------|------------------------------|------------------------------|
| <b>Experimental Models</b>                           |                              |                              |
| Human colorectal cancer tissues                      | This paper                   | N/A                          |
| Patient-derived organoids                            | This paper                   | N/A                          |
| <b>Chemicals, peptides, and recombinant proteins</b> |                              |                              |
| N-2 supplement (100X)                                | ThermoFisher Scientific      | 17502048                     |
| B27 Supplement (NCS21 Supplement (50x), Serum-free)  | Labclinics                   | C21-H                        |
| N-acetyl L-cysteine                                  | Sigma-Aldrich                | A9165                        |
| Nicotinamide                                         | Sigma-Aldrich                | N0636                        |
| Human Recombinant EGF                                | eBioscience                  | BMS320                       |
| Human Recombinant Noggin                             | R&D systems                  | 6057-NG                      |
| A-83-01                                              | Sigma-Aldrich                | SML0788                      |
| SB202190                                             | Sigma-Aldrich                | S7067                        |
| [Leu15]-Gastrin I human                              | Sigma-Aldrich                | G9145                        |
| Human Recombinant RSpondin 1                         | R&D systems                  | 4645-RS                      |
| Human Recombinant FGF-10                             | Peptotech                    | 100-26                       |
| Prostaglandin E2                                     | Sigma - Aldrich              | P6532                        |
| Y-27632                                              | Sigma - Aldrich              | Y0503                        |
| TrypLE™ Express                                      | Life Technologies            | 12605-010                    |
| BME Type 2                                           | R&D                          | 3533-010-002                 |
| DAPI                                                 | Invitrogen                   | P36941                       |
| YAP1 antibody                                        | Abcam                        | ab205270                     |
| IPO7 antibody                                        | Santa Cruz acetylated-lysine | sc-365231                    |
| Acetylated-Lysine antibody                           | Cell signalling              | 9441                         |
| <b>Critical commercial assays</b>                    |                              |                              |
| QIAamp DNA Micro Kit                                 | Qiagen                       | 56304                        |
| RNeasy Micro Kit                                     | Qiagen                       | 74004                        |
| CytoScan™ HD Array Kit and Reagent Kit Bundle        | ThermoScientific             | 901835                       |
| RC DC™ Protein Assay Kit                             | BioRad                       | 5000121                      |
| NEBNext Poly(A) mRNA Magnetic Isolation Module       | New England Biolabs          | E7490S                       |

|                                                                   |                                                                                                                                                                                                                           |                      |
|-------------------------------------------------------------------|---------------------------------------------------------------------------------------------------------------------------------------------------------------------------------------------------------------------------|----------------------|
| NEBNext® Ultra™ II Directional RNA Library Prep Kit for Illumina® | New England Biolabs                                                                                                                                                                                                       | E7760S               |
| NextSeq 500/550 High Output 300 cycles kit                        | Illumina                                                                                                                                                                                                                  | 20024908             |
| <b>Software and algorithms</b>                                    |                                                                                                                                                                                                                           |                      |
| AGCC software                                                     | Affymetrix                                                                                                                                                                                                                | N/A                  |
| Chromosome Analysis Suite (ChAS)                                  | Affymetrix                                                                                                                                                                                                                | software version 4.1 |
| coadread_tcga_pan_can_atlas_2018                                  | <a href="https://www.cell.com/pb-assets/consortium/pancanceratlas/pancani3/index.html">https://www.cell.com/pb-assets/consortium/pancanceratlas/pancani3/index.html</a>                                                   |                      |
| Protein Pilot                                                     | SCIEX                                                                                                                                                                                                                     | Version 5.0          |
| Peak View                                                         | SCIEX                                                                                                                                                                                                                     | Version 2.2          |
| FASTQC                                                            | GitHub                                                                                                                                                                                                                    | Version 0.11.8       |
| fastp                                                             | GitHub                                                                                                                                                                                                                    | Version 0.11         |
| STAR                                                              | GitHub                                                                                                                                                                                                                    | Version 2.7.3a       |
| RSEM                                                              | GitHub                                                                                                                                                                                                                    | Version 1.3.3        |
| Tximport                                                          | GitHub                                                                                                                                                                                                                    | Version 1.16.1       |
| UniProt ID mapping tool                                           | <a href="https://www.uniprot.org/id-mapping">https://www.uniprot.org/id-mapping</a>                                                                                                                                       |                      |
| STRING database                                                   | <a href="https://string-db.org">https://string-db.org</a>                                                                                                                                                                 | Version 12.0         |
| Cytoscape                                                         | <a href="https://cytoscape.org">https://cytoscape.org</a>                                                                                                                                                                 | Version 3.10.2       |
| GSEA                                                              | <a href="https://www.gsea-msigdb.org/gsea/index.jsp">https://www.gsea-msigdb.org/gsea/index.jsp</a>                                                                                                                       | Version 4.3.3        |
| EMT signature                                                     | <a href="https://www.gsea-msigdb.org/gsea/msigdb/human/geneset/HALLMARK_EPITHELIAL_MESENCHYMAL_TRANSITION.html">https://www.gsea-msigdb.org/gsea/msigdb/human/geneset/HALLMARK_EPITHELIAL_MESENCHYMAL_TRANSITION.html</a> | Version 5.0          |
| DepMap                                                            | <a href="https://depmap.org/portal/">https://depmap.org/portal/</a>                                                                                                                                                       |                      |
| KMplot                                                            | <a href="https://kmplot.com/analysis/">https://kmplot.com/analysis/</a>                                                                                                                                                   |                      |
| TNMplot                                                           | <a href="https://tnmplot.com/analysis/">https://tnmplot.com/analysis/</a>                                                                                                                                                 |                      |
| ISMARA                                                            | <a href="https://ismara.unibas.ch/mara/">https://ismara.unibas.ch/mara/</a>                                                                                                                                               |                      |
| MitoCarta                                                         | <a href="https://www.broadinstitute.org/files/shared/metabolism/mitocarta/human.mitocarta3.0.html">https://www.broadinstitute.org/files/shared/metabolism/mitocarta/human.mitocarta3.0.html</a>                           | Version 3.0          |
| ImageJ                                                            | <a href="http://imagej.nih.gov/ij">http://imagej.nih.gov/ij</a>                                                                                                                                                           | Version 1.53a        |
| CellProfiler                                                      | Broad Institute <a href="https://cellprofiler.org">https://cellprofiler.org</a>                                                                                                                                           | Version 4.2.8        |
| <b>Deposited data</b>                                             |                                                                                                                                                                                                                           |                      |
| RNAseq                                                            | ENA                                                                                                                                                                                                                       | PRJEB57288           |
| Mass spectrometry                                                 | ProteomeXchange Consortium, PRIDE                                                                                                                                                                                         | PXD038149            |
| CytoscanHD                                                        | ENA                                                                                                                                                                                                                       | PRJEB75321           |

**Table S2 Patient characteristics**

| ID sample | Tissue /PDOs | Gender | Ethnicity | PTL     | CIN status | RAS RAF         | MSS MSI | CNA analysis | Transcriptomic signature | Proteotranscriptomic integration |
|-----------|--------------|--------|-----------|---------|------------|-----------------|---------|--------------|--------------------------|----------------------------------|
| RTO2      | +/+          | F      | Caucasian | rectum  | CIN+       | <i>KRAS</i> mut | MSS     | yes          | yes                      | yes                              |
| RTO7      | +/+          | M      | Caucasian | rectum  | CIN+       | wt              | MSS     | yes          | yes                      | yes                              |
| mCTO24S2  | +/+          | F      | Caucasian | sigmoid | CIN-       | <i>KRAS</i> mut | MSS     | yes          | yes                      | no                               |
| mCTO24S7  | +/+          | F      | Caucasian | sigmoid | CIN-       | <i>KRAS</i> mut | MSS     | yes          | no                       | no                               |
| mCTT24B   | +/-          | F      | Caucasian | sigmoid | CIN+       | <i>KRAS</i> mut | MSS     | yes          | no                       | no                               |
| mCTO38S5  | +/+          | M      | Caucasian | rectum  | CIN+       | wt              | MSS     | yes          | no                       | no                               |
| mCTT38S8  | +/-          | M      | Caucasian | rectum  | CIN+       | wt              | MSS     | yes          | no                       | no                               |
| mCTO43    | +/+          | M      | Caucasian | sigmoid | CIN+       | wt              | MSS     | yes          | yes                      | yes                              |
| mCTO46    | +/+          | M      | Caucasian | rectum  | CIN+       | <i>KRAS</i> mut | MSS     | yes          | no                       | no                               |
| mCTO47    | +/+          | M      | Caucasian | sigmoid | CIN+       | wt              | MSS     | yes          | yes                      | no                               |
| mCTO50    | -/+          | F      | Caucasian | cecum   | CIN-       | wt              | MSI     | yes          | yes                      | yes                              |
| mCTO50B   | +/+          | F      | Caucasian | cecum   | CIN-       | wt              | MSI     | yes          | yes                      | yes                              |
| mCTO66S3  | +/+          | M      | Caucasian | rectum  | CIN+       | <i>KRAS</i> mut | MSS     | yes          | yes                      | yes                              |
| mCTO66S7  | +/+          | M      | Caucasian | rectum  | CIN+       | <i>KRAS</i> mut | MSS     | yes          | no                       | no                               |

Figure S1

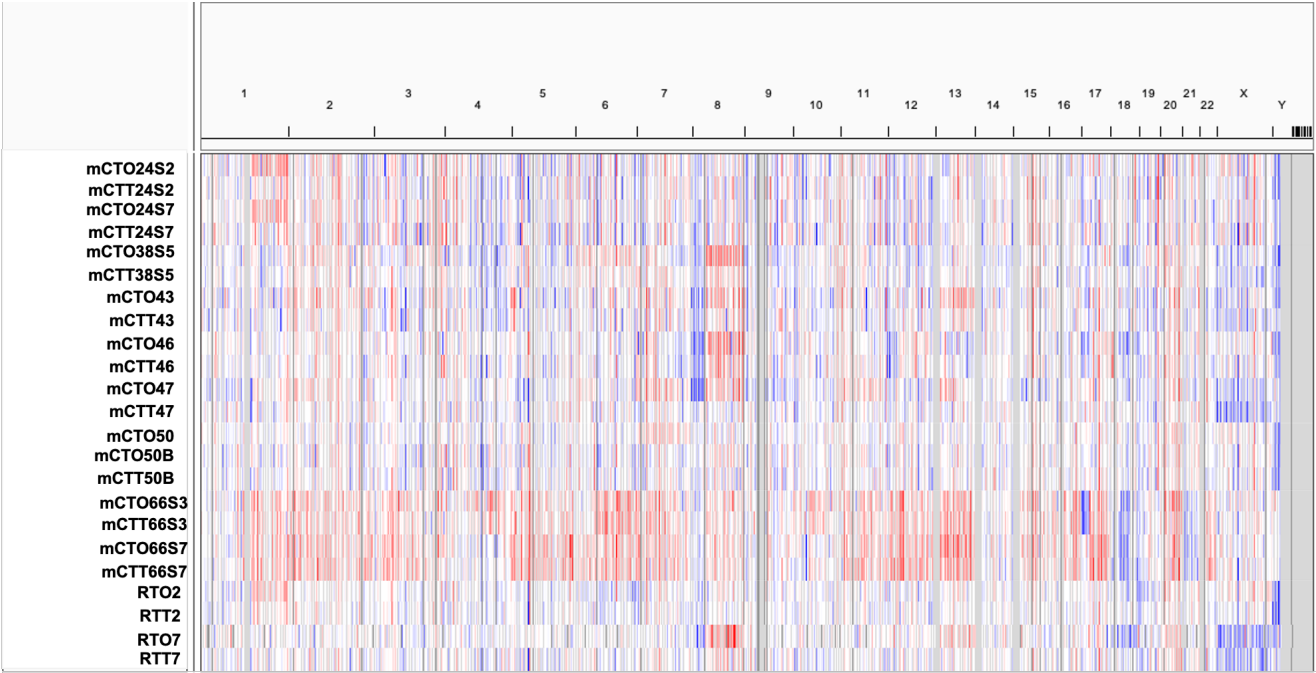

Figure S2

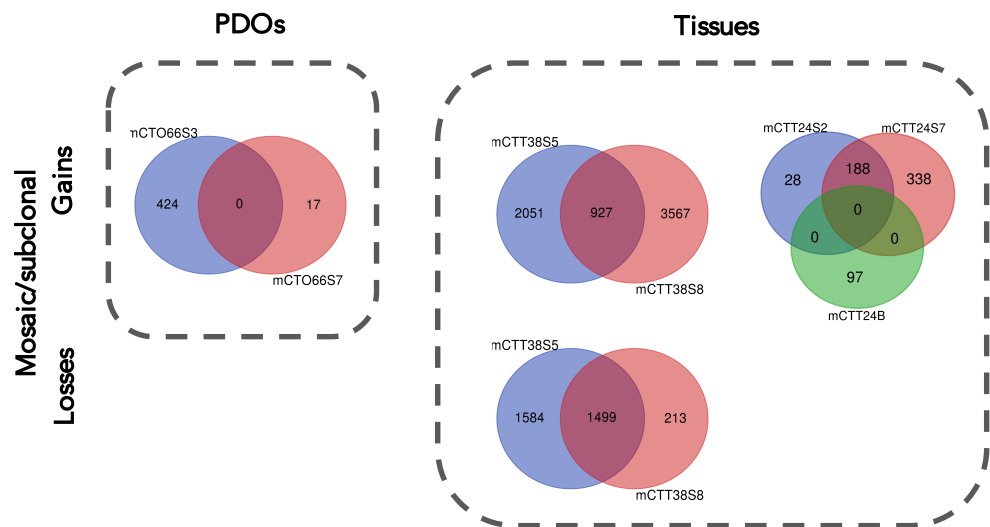

a

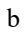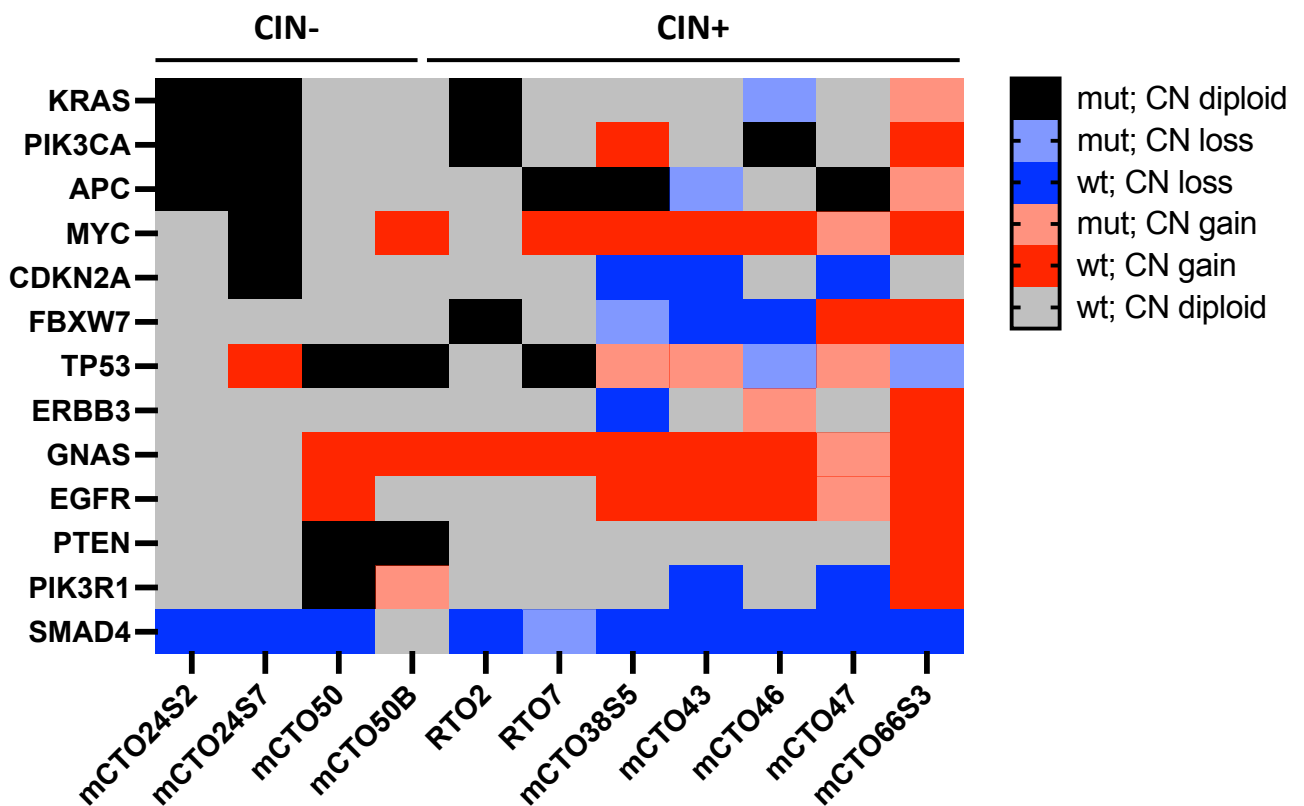

Figure S4

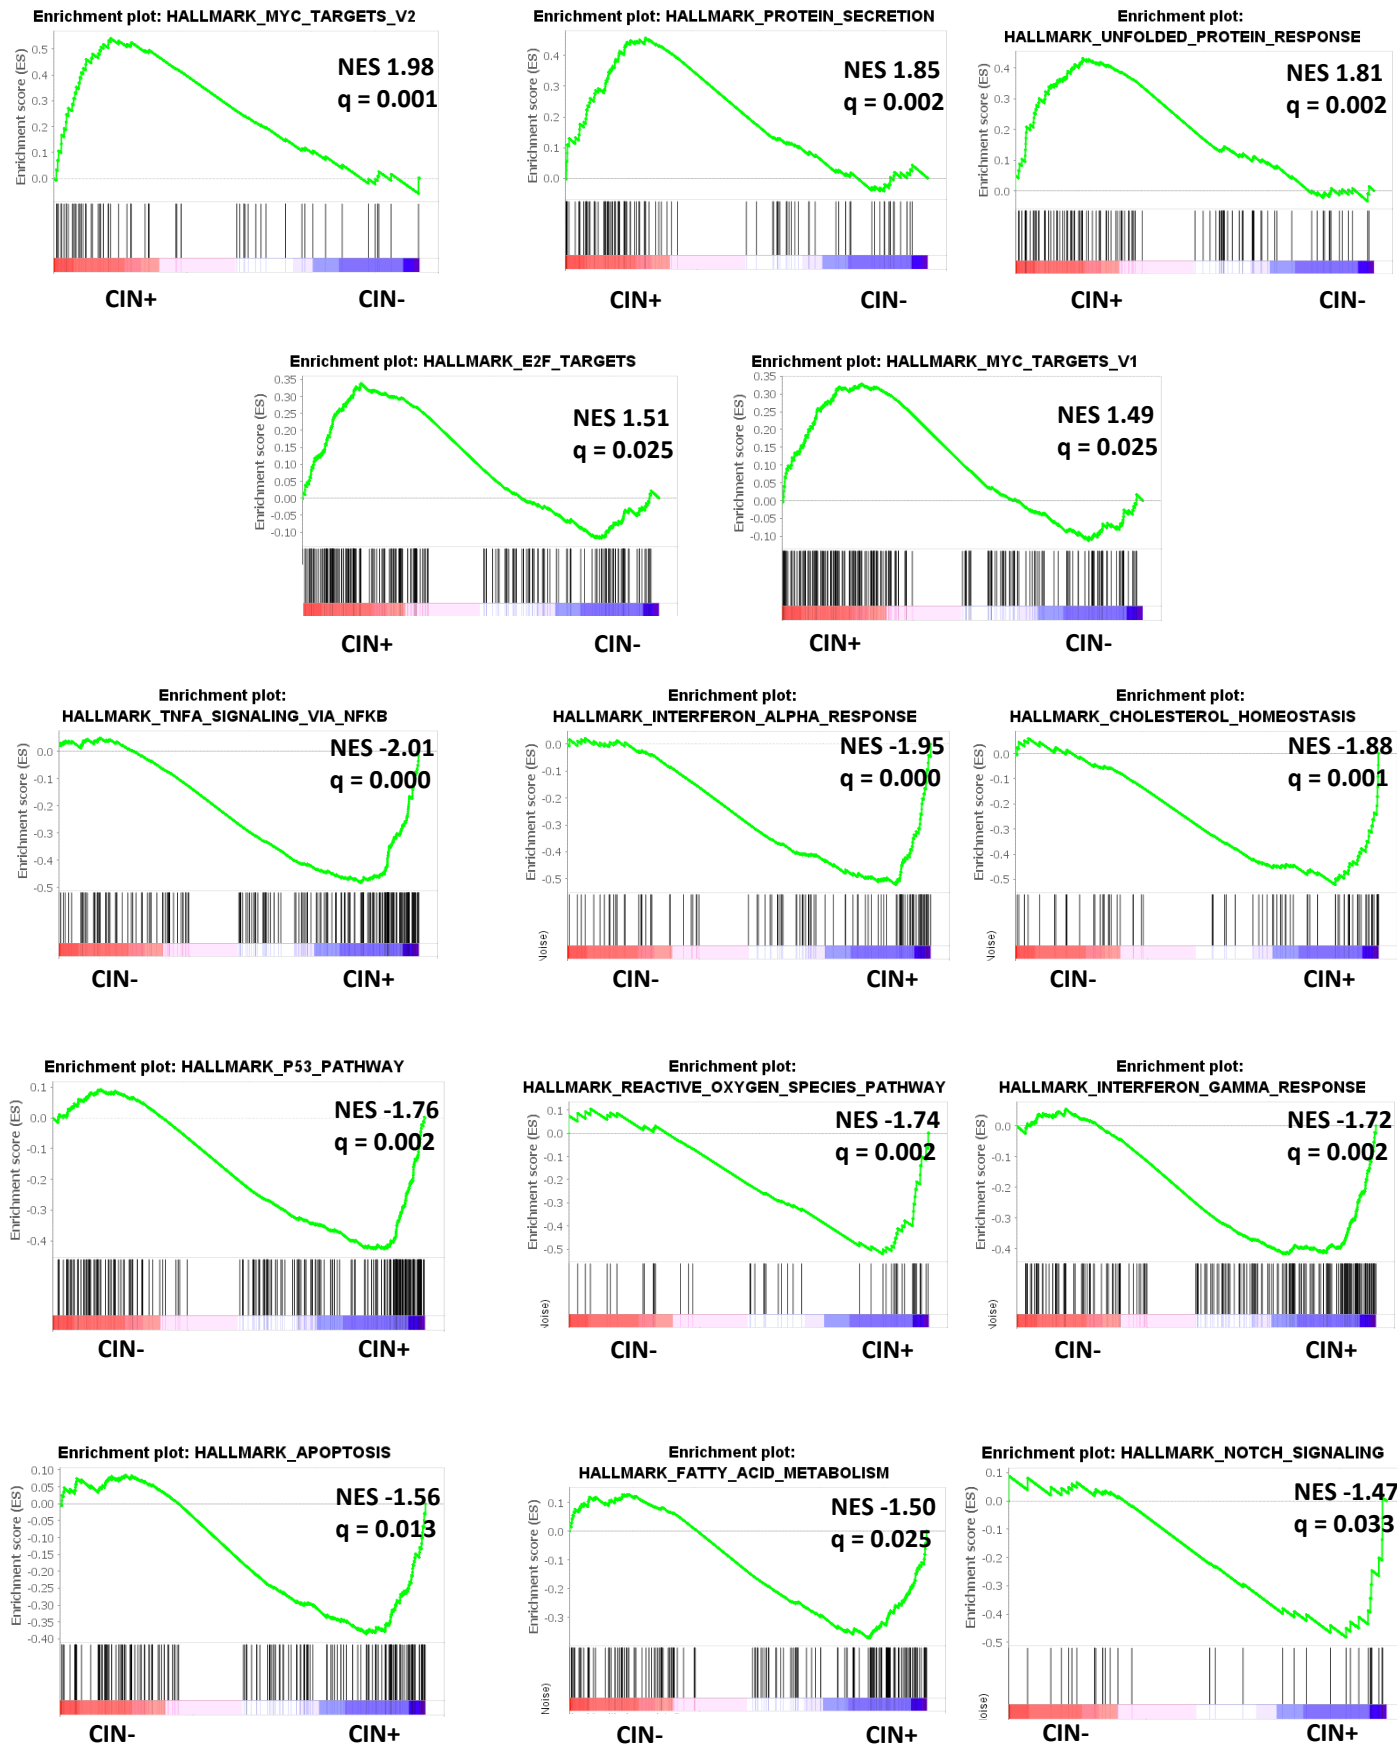

Figure S5

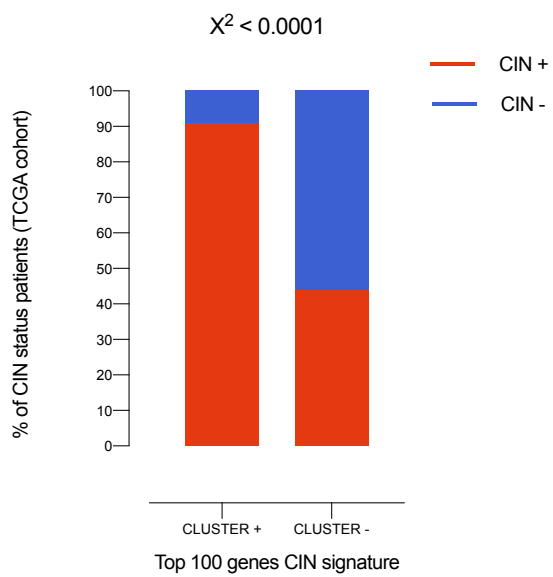

Figure S6

HET70 signature

CIN70 signature

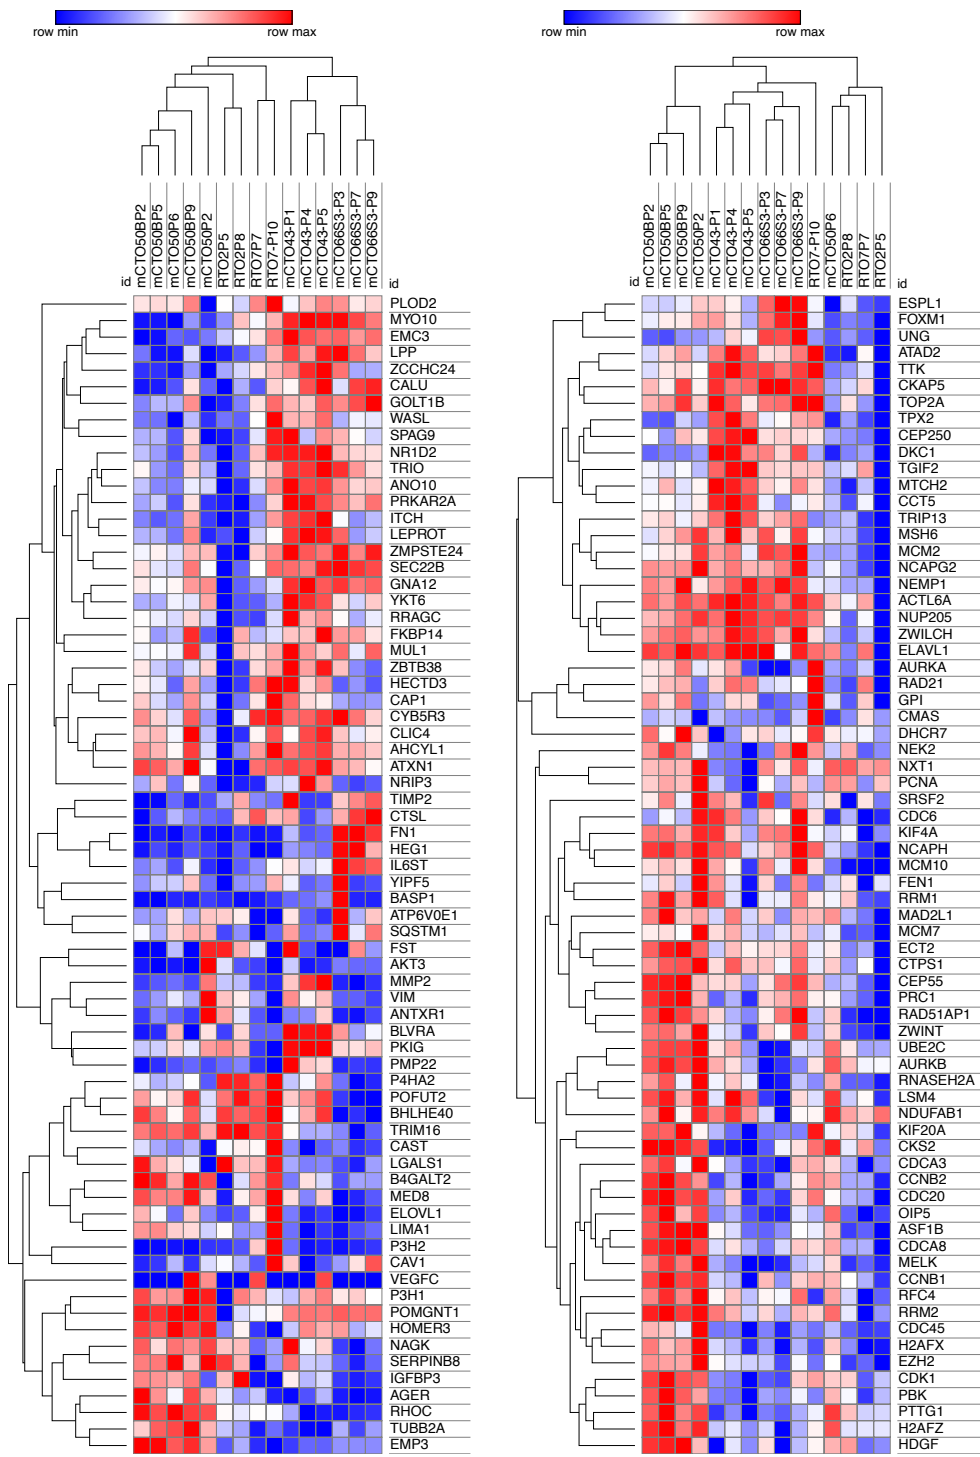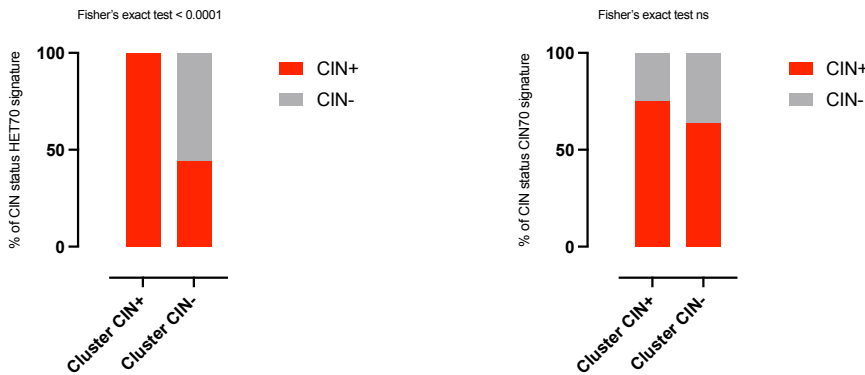

Figure S7

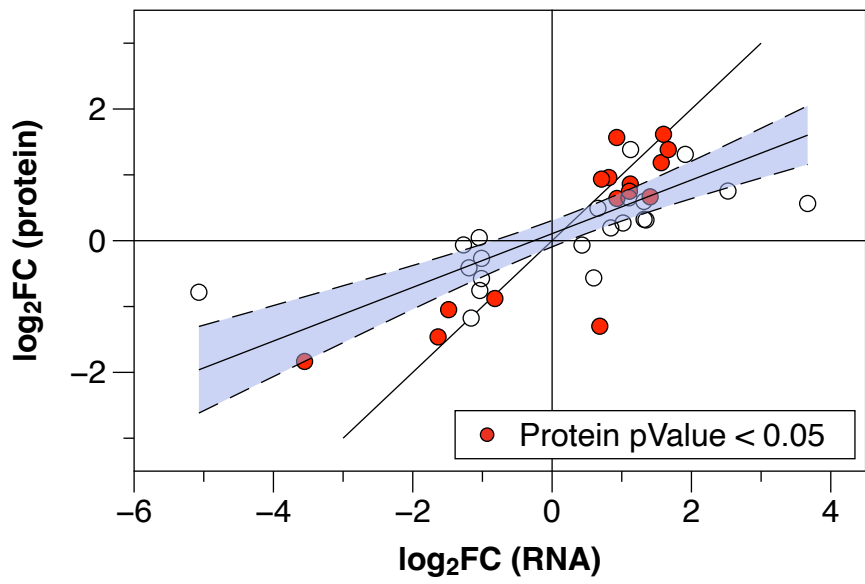

Figure S8

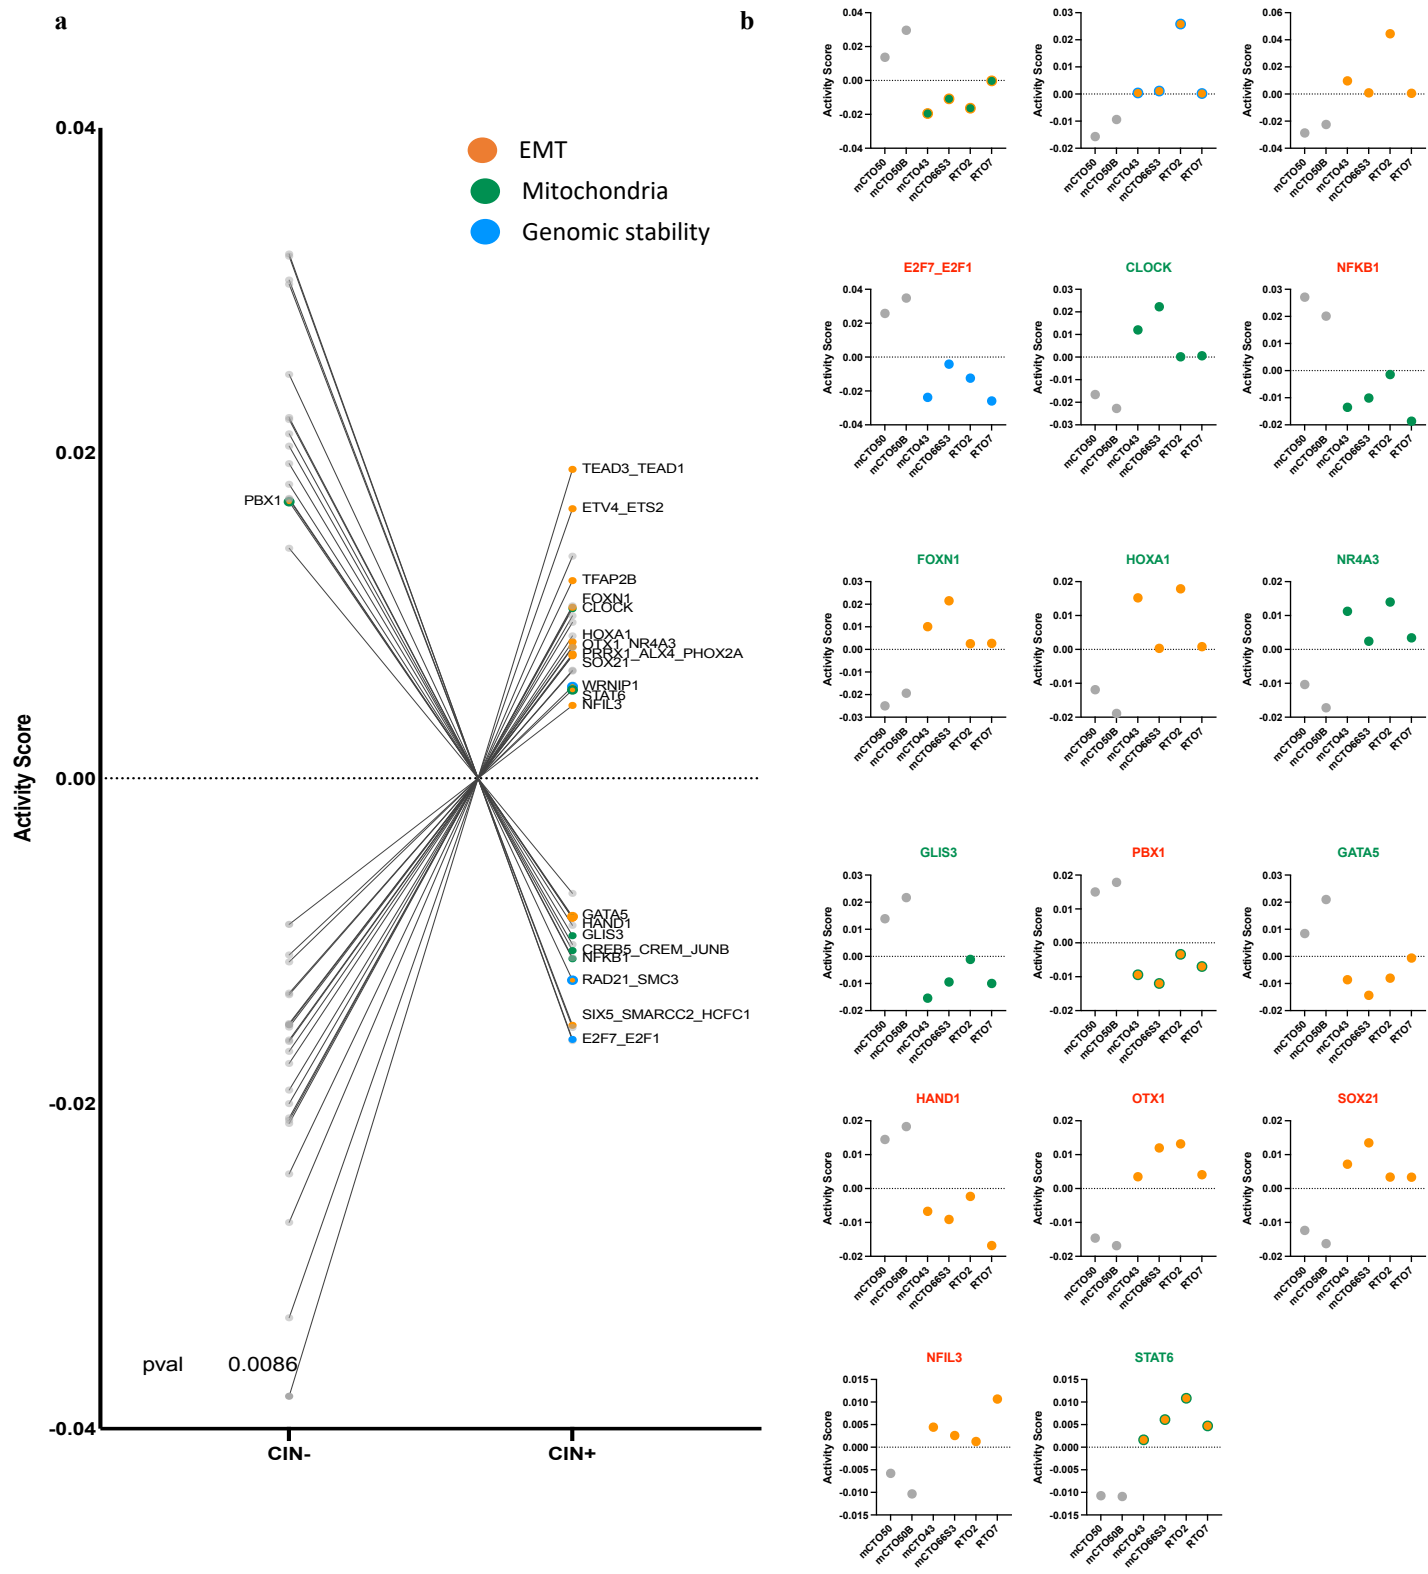

Figure S9

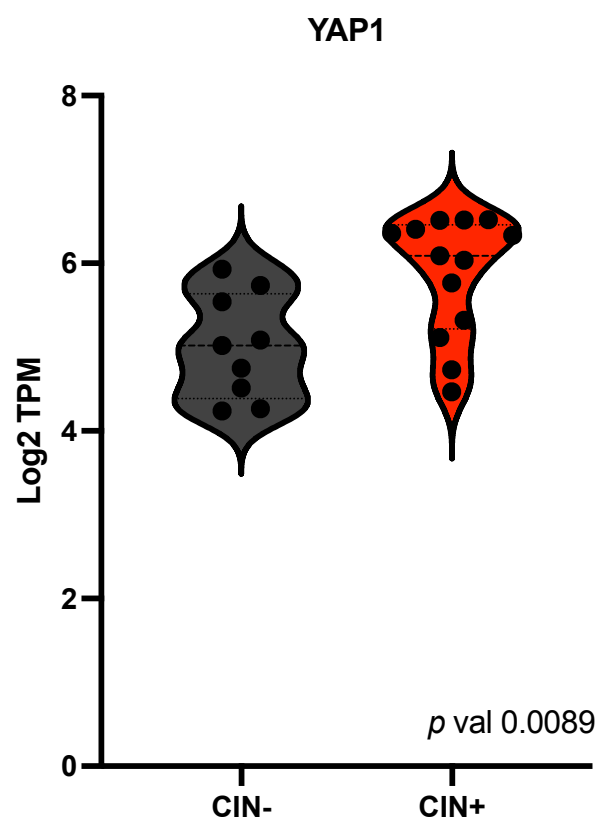

Figure S10

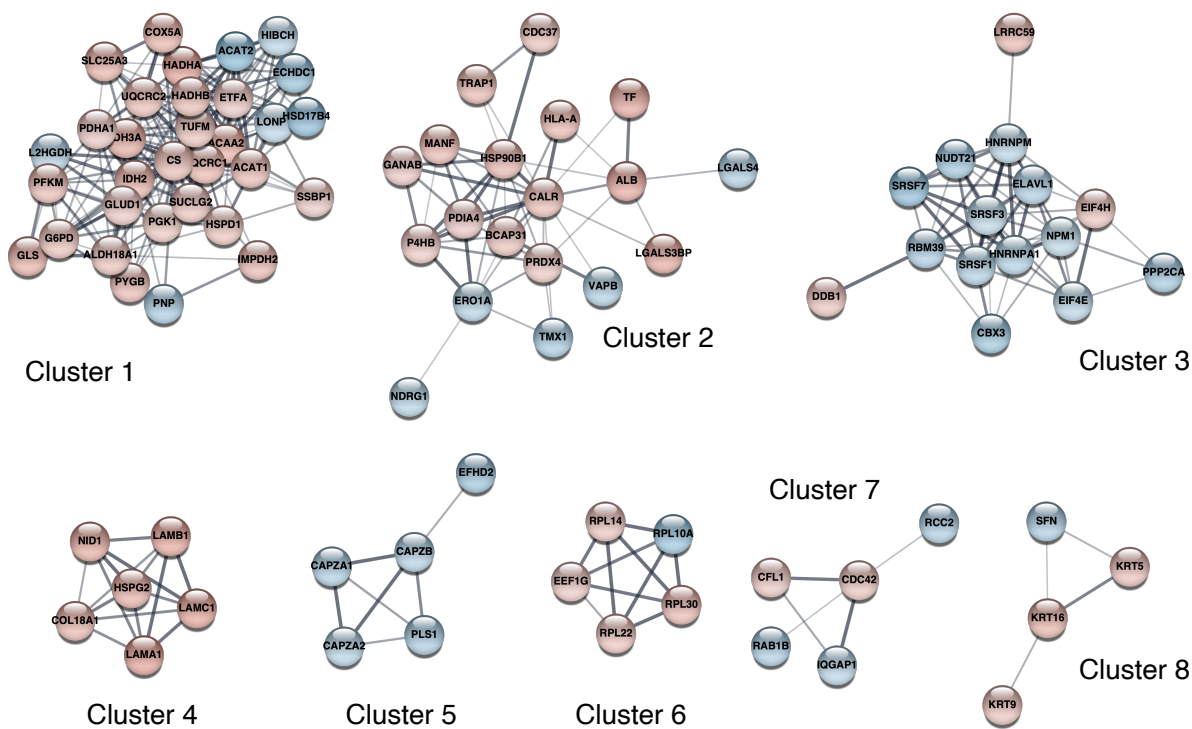

a

Figure S11

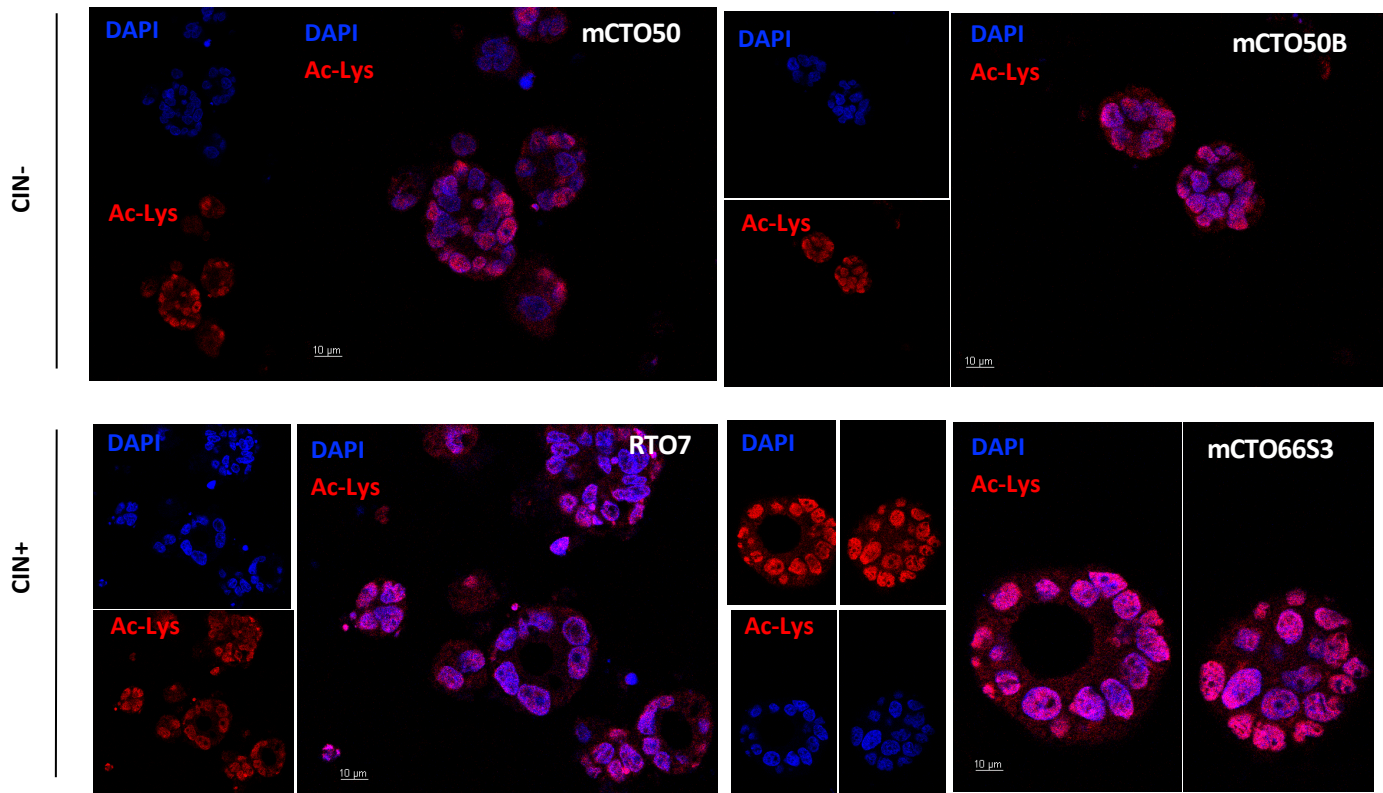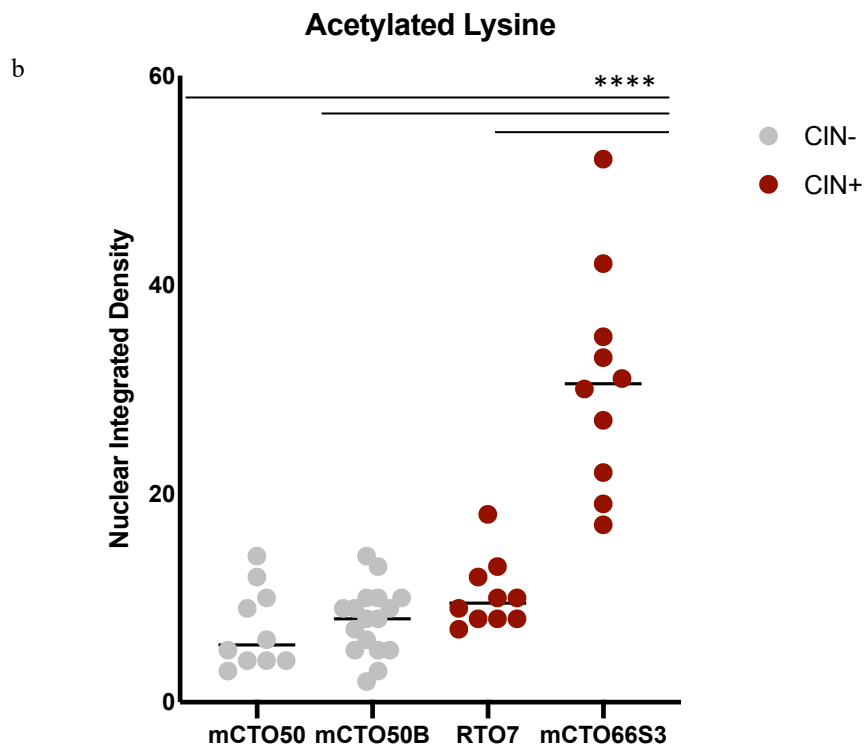

Figure S12

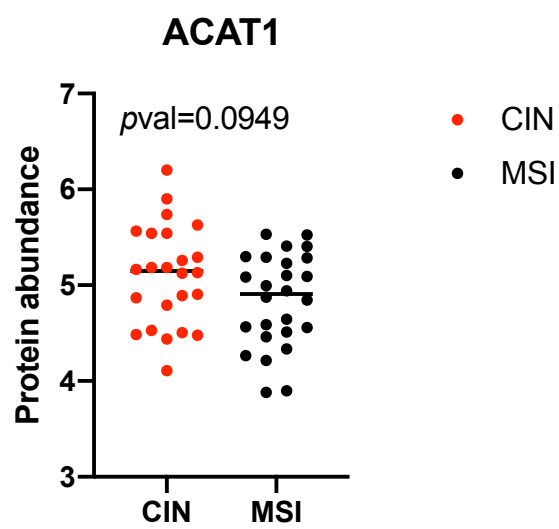

Figure S13

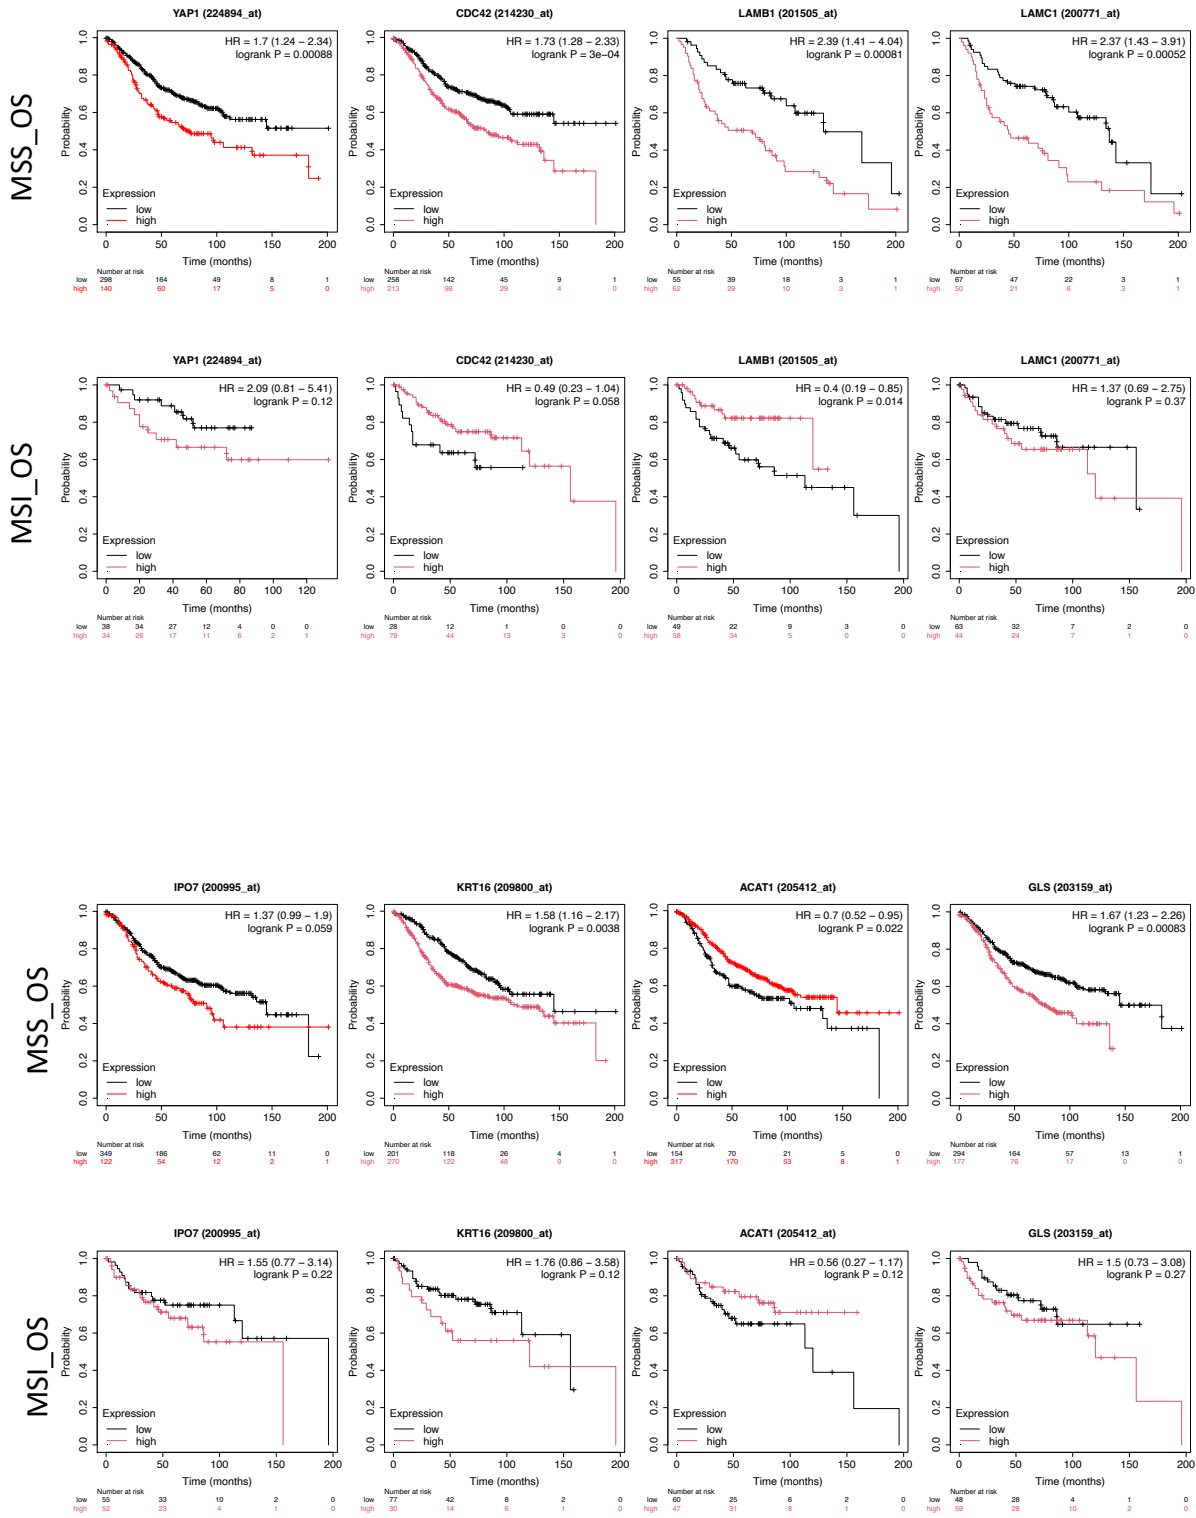

Figure S14

MSS\_RFS\_St3-4

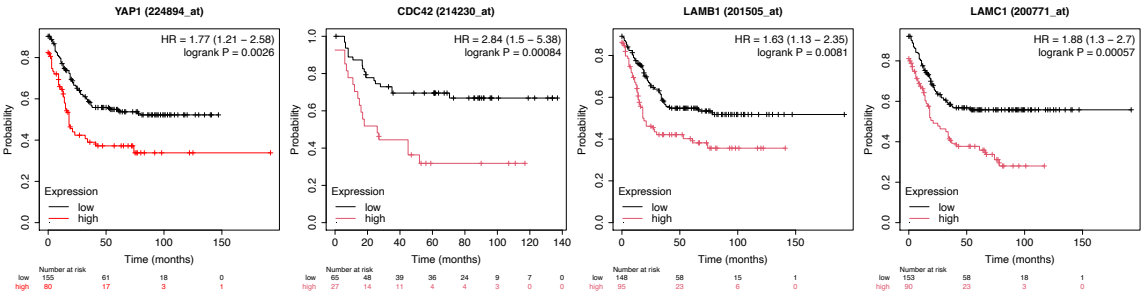

MSI\_RFS\_St3-4

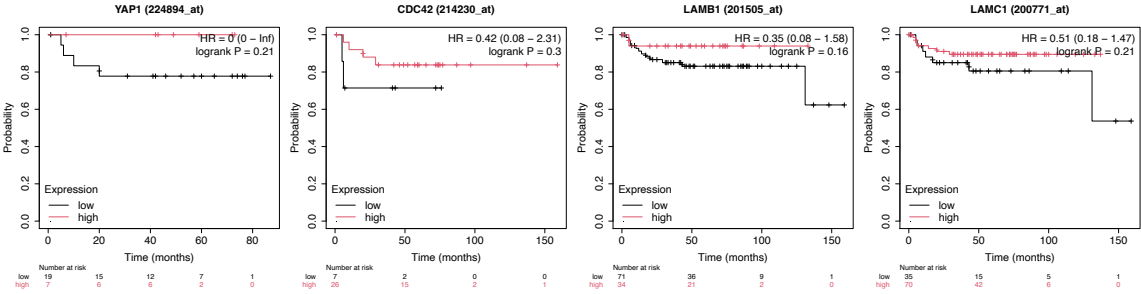

MSS\_RFS\_St3-4

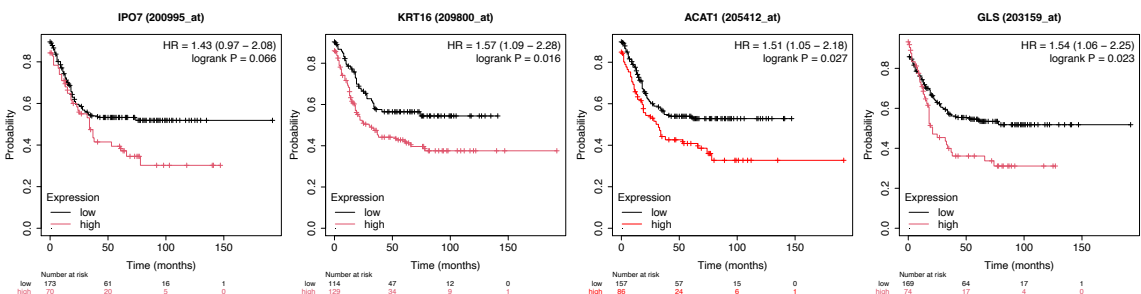

MSI\_RFS\_St3-4

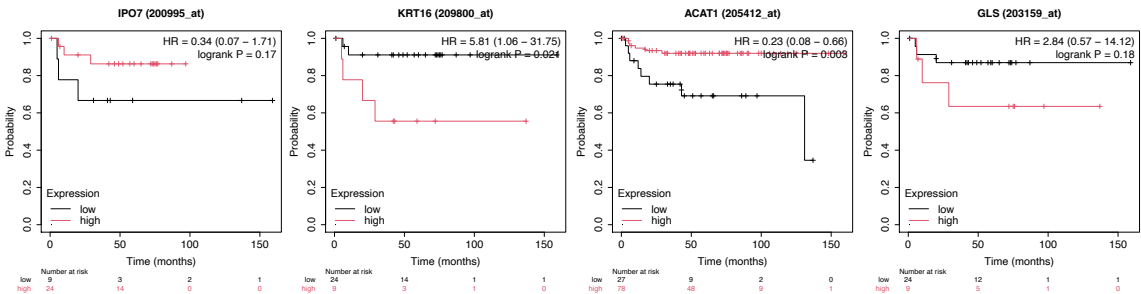

Figure S15

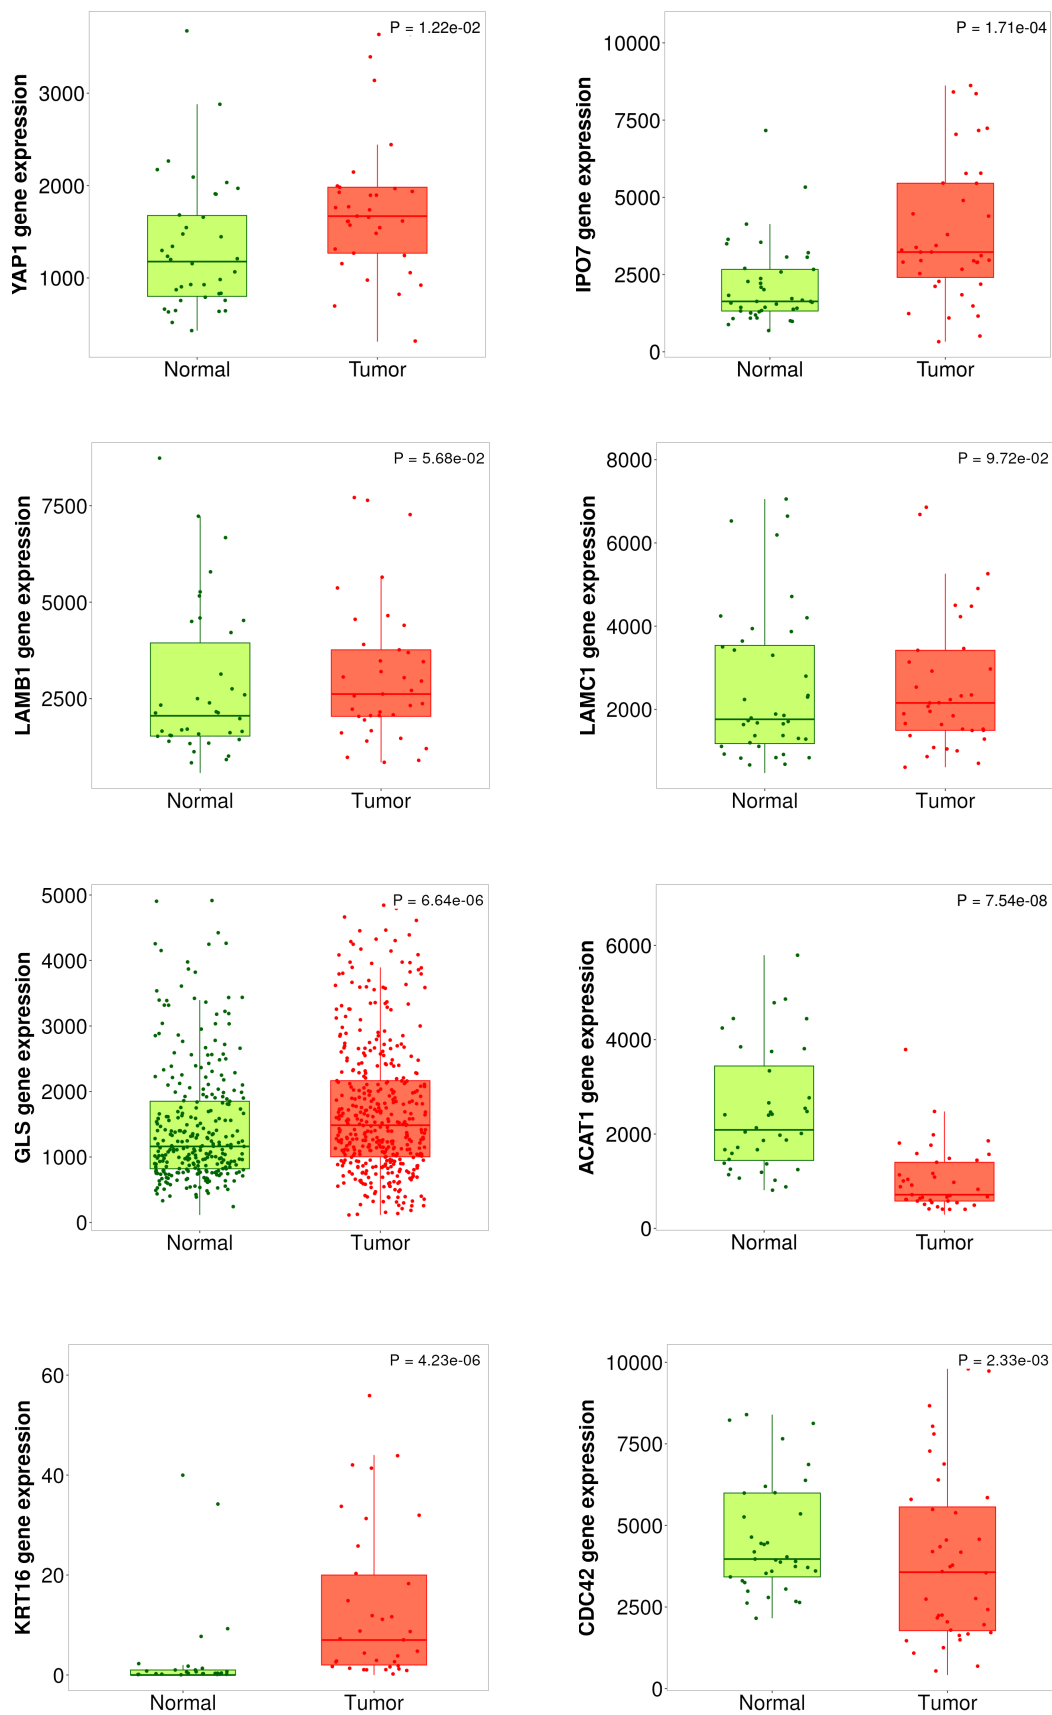

Supplement: MOESM1 [file 13046_2025_3308_MOESM1_ESM.pdf]
